# Supplementary material for: Real-time electrochemical monitoring of isothermal helicase-dependent amplification of nucleic acids
Source: Royal Society of Chemistry journal article supplement (doi:10.1039/c1an15289k), 2011-01-01
Supplement: c1an15289k.pdf [file c1an15289k.pdf]

## Supplementary Information

# Real-time electrochemical monitoring of isothermal helicase-dependent amplification of nucleic acids

Francine Kivlehan,<sup>a</sup> François Mavr ,<sup>a</sup> Luc Talini,<sup>b</sup> Beno t Limoges,<sup>\*a</sup> and Damien Marchal<sup>\*a</sup>

<sup>a</sup>Laboratoire d'Electrochimie Mol culaire, UMR 7591 CNRS, Univ Paris Diderot, Sorbonne Paris Cit , 15 rue Jean-Antoine de Baif, F-75205 Paris Cedex 13, France. E-mails: [marchal@univ-paris-diderot.fr](mailto:marchal@univ-paris-diderot.fr), [limoges@univ-paris-diderot.fr](mailto:limoges@univ-paris-diderot.fr).

<sup>b</sup>Easy Life Science, 68, Boulevard de Port-Royal, 75005 Paris Cedex 05, France.

### Real-time fluorescent-based PCR

Figure S1 shows the real-time PCR amplification curves for serial dilutions (10-fold) of the 89-bp target DNA sequence of *E. Coli*. The experimental conditions are described in the Experimental Section. Graph A in Figure S1 corresponds to the baseline corrected relative fluorescence intensity ( $\Delta R_n$ ) of EvaGreen<sup>®</sup> dye versus amplification time, while graph B is the corresponding semi-logarithmic representation. The horizontal dashed line in graph B was used to determine the threshold cycle numbers that were next used to establish the calibration plot in C. A linear dynamic range between  $2 \times 10^3$  to  $5 \times 10^9$  initial target copies was determined from graph C, with a detection limit of  $\sim 10^3$  initial target copies, while a PCR efficiency of 1.8 can be calculated from the slope, which is closed to the theoretical value of 2.

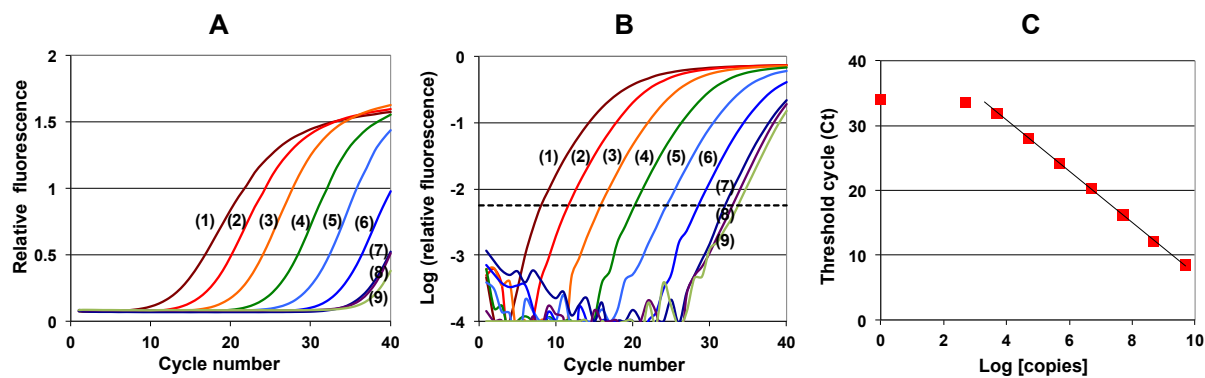

**Figure S1.** (A, B) EvaGreen<sup>®</sup>-based Real-time PCR amplification curves of the 89-bp DNA target. The concentration of primers in each reaction solution was 75 nM and the initial number of target DNA copies per assay was: (1)  $5 \times 10^9$ ; (2)  $5 \times 10^8$ ; (3)  $5 \times 10^7$ ; (4)  $5 \times 10^6$ ; (5)  $5 \times 10^5$ ; (6)  $5 \times 10^4$ ; (7)  $5 \times 10^3$ ; (8)  $5 \times 10^2$  and (9) 0 (NTC). (B) Semi-logarithmic representation of the relative fluorescence intensity as a function of PCR cycle number. (C) Calibration plot (slope: -3,96, intercept: 46.7,  $r = 0.9995$ ).
